# Supplementary material for: Increased levels of IAA are required for system 2 ethylene synthesis causing fruit softening in peach (Prunus persica L. Batsch)
Source: PubMed Central journal article supplement — J Exp Bot. 2013 Feb 23;64(4):1049–59. doi: 10.1093/jxb/ers381 (PMC3580816; doi:10.1093/jxb/ers381), 2013-02-23
Supplement: supp_ers381_jexbot087825_file001.pdf [file supp_ers381_jexbot087825_file001.pdf]

Journal of Experimental Botany

Increased levels of IAA are required for system 2 ethylene synthesis causing fruit softening in peach (*Prunus persica* (L). Batsch)

Miho Tatsuki, Naoko Nakajima, Hiroshi Fujii, Takehiko Shimada, Michiharu Nakano, Ken-ichiro Hayashi, Hiroko Hayama, Hirohito Yoshioka, Yuri Nakamura.

**Table S1** Oligonucleotide primers used in qRT-PCR

| Name                                | Oligonucleotide sequence        |
|-------------------------------------|---------------------------------|
| PpACS1 forward                      | 5'- GCCTTCCGGGTTTTTCGA-3'       |
| PpACS1 reverse                      | 5'- GGCGGCCACAACCATGT-3'        |
| PpACS2 forward                      | 5'-GGAAAAGCACTTGAAGAAAATTC-3'   |
| PpACS2 reverse                      | 5'-CGCTCCTTTTGATCCCTTTG-3'      |
| PpACO1 forward                      | 5'- GAATGTCGATAGCCTCGTTCTACA-3' |
| PpACO1 reverse                      | 5'- GGTGCTGGGCTGATGAATG-3'      |
| PpPG2 forward                       | 5'- AAGGTTTCGTGTGCCGTTGTA-3'    |
| PpPG2 reverse                       | 5'- CGGGATAATGTGAACGAGCAT-3'    |
| <i>Prunus_v4_Contig5085</i> forward | 5'- TGCGAAACCAGAATCTTCAAGA-3'   |
| <i>Prunus_v4_Contig5085</i> reverse | 5'- CCTCAGTTGACGCTGGATAAAA-3'   |
| actin forward                       | 5'- GATTCCGGTGCCCAGAAGT -3'     |
| actin reverse                       | 5'- CCAGCAGCTTCCATTCCAA -3'     |

Table S2. Pearson's correlation coefficient (PCC) and signal intensity of 29 filtered genes with similar expression patterns for *PpACS1*

| Probe ID                    | Annotation                                               | PCC  | Akatsuki              |         |         |         | Manami  |           | Odoroki |           |
|-----------------------------|----------------------------------------------------------|------|-----------------------|---------|---------|---------|---------|-----------|---------|-----------|
|                             |                                                          |      | days after full bloom |         |         |         | Air     | Propylene | Air     | Propylene |
|                             |                                                          |      | 92                    | 98      | 104     | 106     |         |           |         |           |
| 1 Prunus_AJ533769           | Homeobox-leucine zipper protein 17 (HB-17)               | 0.88 | 1.4E+02               | 8.6E+02 | 2.0E+03 | 1.5E+03 | 1.9E+01 | 1.1E+01   | 5.8E+01 | 5.8E+01   |
| 2 Prunus_DW348600           | ATNUDT2 (Arabidopsis thaliana Nudix hydrolase homolog 2) | 0.97 | 1.3E+02               | 4.9E+02 | 1.2E+03 | 1.5E+03 | 3.1E+02 | 5.5E+02   | 8.1E+02 | 1.6E+03   |
| 3 Prunus_DY652512           |                                                          | 0.94 | 5.8E+03               | 1.4E+04 | 4.0E+04 | 5.1E+04 | 1.2E+04 | 2.3E+04   | 4.8E+04 | 5.0E+04   |
| 4 Prunus_DY654073           |                                                          | 0.89 | 3.3E+03               | 7.5E+03 | 1.0E+04 | 9.6E+03 | 4.8E+02 | 7.3E+02   | 2.9E+03 | 4.3E+03   |
| 5 Prunus_EE488466           |                                                          | 0.89 | 1.1E+04               | 3.3E+04 | 5.1E+04 | 4.1E+04 | 4.1E+03 | 7.9E+03   | 2.5E+04 | 2.9E+04   |
| 6 Prunus_v4_Contig1550      | Calcium ion binding protein                              | 0.95 | 1.2E+03               | 1.8E+03 | 4.4E+03 | 9.9E+03 | 1.5E+03 | 2.3E+03   | 1.3E+04 | 2.6E+04   |
| 7 Prunus_v4_Contig1633      |                                                          | 0.94 | 1.1E+03               | 2.0E+03 | 2.3E+03 | 5.9E+03 | 6.8E+02 | 9.1E+02   | 8.7E+03 | 5.3E+03   |
| 8 Prunus_v4_Contig1891      |                                                          | 0.85 | 1.2E+03               | 1.6E+03 | 2.4E+03 | 2.4E+03 | 2.1E+02 | 1.6E+02   | 3.3E+02 | 5.0E+02   |
| 9 Prunus_v4_Contig1945      | REDUCTASE OXIDOREDUCTASE IRON-SULFUR                     | 0.94 | 1.2E+03               | 2.1E+03 | 3.6E+03 | 8.8E+03 | 5.6E+02 | 3.1E+02   | 1.9E+03 | 2.8E+03   |
| 10 Prunus_v4_Contig2173     | IAA9 (indoleacetic acid-induced protein 9)               | 0.87 | 7.4E+03               | 1.1E+04 | 1.5E+04 | 1.3E+04 | 1.3E+03 | 2.4E+03   | 7.1E+03 | 4.1E+03   |
| 11 Prunus_v4_Contig2986     |                                                          | 0.98 | 1.9E+03               | 2.3E+03 | 3.3E+03 | 4.5E+03 | 2.8E+03 | 2.6E+03   | 7.2E+03 | 5.1E+03   |
| 12 Prunus_v4_Contig3538     | Gibberellin 2-beta-dioxygenase                           | 0.88 | 1.4E+03               | 9.2E+03 | 2.2E+04 | 4.0E+04 | 1.4E+04 | 1.0E+04   | 2.8E+04 | 1.5E+04   |
| 13 Prunus_v4_Contig3715     |                                                          | 0.98 | 3.7E+02               | 1.0E+03 | 1.7E+03 | 2.9E+03 | 9.1E+02 | 1.2E+03   | 3.0E+03 | 2.2E+03   |
| 14 Prunus_v4_Contig5320     |                                                          | 0.92 | 5.9E+03               | 7.2E+03 | 8.1E+03 | 5.1E+03 | 6.6E+03 | 1.1E+04   | 1.7E+04 | 1.2E+04   |
| 15 Prunus_v4_Contig5832     | AUXIN-INDUCED PROTEIN-LIKE MULTIGENE                     | 0.99 | 7.5E+02               | 2.0E+03 | 5.4E+03 | 9.6E+03 | 1.6E+04 | 2.9E+04   | 4.7E+04 | 2.8E+04   |
| 16 Prunus_v4_Contig5890     |                                                          | 0.99 | 3.4E+02               | 1.1E+03 | 2.4E+03 | 5.2E+03 | 4.1E+03 | 6.1E+03   | 7.0E+03 | 1.4E+04   |
| 17 Prunus_v4_Contig6623     | ATSIP2 (ARABIDOPSIS THALIANA SEED IMBIBITION 2)          | 0.92 | 5.0E+03               | 1.1E+04 | 1.3E+04 | 1.4E+04 | 1.7E+03 | 2.5E+03   | 1.1E+04 | 7.3E+03   |
| 18 Prunus_v4_Contig7034     |                                                          | 0.85 | 1.7E+03               | 4.0E+03 | 5.9E+03 | 6.2E+03 | 3.2E+03 | 2.5E+03   | 7.3E+03 | 3.6E+03   |
| 19 Prunus_v4_Contig8994     | IAA16 (indoleacetic acid-induced protein 16)             | 0.88 | 1.8E+02               | 9.5E+02 | 1.3E+03 | 5.5E+03 | 2.9E+01 | 2.1E+01   | 1.7E+02 | 8.6E+01   |
| 20 R_Prunus_CB821238        |                                                          | 0.92 | 1.5E+03               | 1.6E+03 | 1.7E+03 | 2.1E+03 | 1.4E+03 | 2.5E+03   | 6.2E+03 | 4.6E+03   |
| 21 R_Prunus_DW343225        |                                                          | 0.95 | 2.0E+03               | 2.5E+03 | 2.5E+03 | 2.9E+03 | 6.1E+02 | 6.8E+02   | 1.8E+03 | 1.3E+03   |
| 22 R_Prunus_DY636010        |                                                          | 0.92 | 2.1E+03               | 6.6E+03 | 1.1E+04 | 1.0E+04 | 4.8E+03 | 7.3E+03   | 1.7E+04 | 9.0E+03   |
| 23 R_Prunus_v4_Contig2011   | GASA5 (GAST1 PROTEIN HOMOLOG 5)                          | 0.94 | 5.6E+04               | 1.1E+05 | 1.8E+05 | 1.7E+05 | 1.5E+05 | 1.4E+05   | 3.2E+05 | 2.6E+05   |
| 24 R_Prunus_v4_Contig4064   |                                                          | 0.93 | 1.2E+03               | 2.1E+03 | 3.0E+03 | 2.8E+03 | 4.1E+02 | 7.5E+02   | 3.1E+03 | 1.7E+03   |
| 25 ULR_Prunus_v4_Contig1569 |                                                          | 0.92 | 6.1E+02               | 1.3E+03 | 3.2E+03 | 2.3E+03 | 7.3E+00 | 8.1E+00   | 2.3E+01 | 2.4E+01   |
| 26 URF_Prunus_v4_Contig3599 |                                                          | 0.87 | 3.1E+03               | 3.6E+03 | 4.3E+03 | 4.7E+03 | 3.1E+03 | 4.6E+03   | 9.3E+03 | 7.4E+03   |
| 27 URF_Prunus_v4_Contig6298 |                                                          | 0.93 | 9.0E+03               | 1.5E+04 | 1.5E+04 | 2.0E+04 | 1.2E+04 | 2.2E+04   | 5.2E+04 | 2.7E+04   |
| 28 URF_Prunus_v4_Contig772  |                                                          | 0.93 | 7.8E+02               | 1.1E+03 | 2.1E+03 | 1.7E+03 | 1.1E+02 | 1.9E+02   | 1.7E+03 | 9.3E+02   |
| 29 URF_Prunus_v4_Contig9013 |                                                          | 0.97 | 3.3E+04               | 4.7E+04 | 6.1E+04 | 6.2E+04 | 1.7E+04 | 2.8E+04   | 9.0E+04 | 5.3E+04   |

Table S3. Pearson's correlation coefficient (PCC) and signal intensity of IAA related genes with similar expression patterns for *PpACS1*

| Probe ID                   | Annotation                                      | PCC   | Akatsuki              |         |         |         | Manami  |           | Odoroki |           |
|----------------------------|-------------------------------------------------|-------|-----------------------|---------|---------|---------|---------|-----------|---------|-----------|
|                            |                                                 |       | days after full bloom |         |         |         | Air     | Propylene | Air     | Propylene |
|                            |                                                 |       | 92                    | 98      | 104     | 106     |         |           |         |           |
| 1 URR_Prunus_v4_Contig5085 | indole-3-acetic acid inducible 29               | 0.95  | 3.2E+00               | 2.5E+02 | 4.3E+03 | 3.8E+03 | 1.8E+01 | 2.7E+00   | 2.9E+00 | 4.1E+00   |
| 2 URR_Prunus_v4_Contig1538 | ATAUX2-11 (indoleacetic acid-induced protein 4) | 0.80  | 3.2E+03               | 1.1E+04 | 3.2E+04 | 2.4E+04 | 2.0E+01 | 3.2E+02   | 4.0E+02 | 1.6E+02   |
| 3 R_Prunus_v4_Contig8766   | IAA13 (indoleacetic acid-induced protein 13)    | 0.79  | 3.7E+03               | 7.5E+03 | 1.5E+04 | 7.7E+03 | 1.4E+02 | 8.1E+02   | 1.4E+03 | 1.3E+03   |
| 4 R_Prunus_BU046438        | SAUR-like auxin-responsive protein family       | 0.33  | 1.3E+04               | 1.8E+04 | 3.2E+04 | 1.4E+04 | 1.6E+01 | 4.6E+01   | 2.3E+02 | 2.3E+01   |
| 5 R_Prunus_AJ875835        | IAA12 (AUXIN-INDUCED PROTEIN 12)                | 0.76  | 2.1E+02               | 3.0E+02 | 9.8E+02 | 7.0E+02 | 5.5E+01 | 2.0E+00   | 1.8E+01 | 1.9E+01   |
| 6 R_Prunus_AJ823619        | IAA6 (indoleacetic acid-induced protein 6)      | 0.69  | 1.9E+04               | 5.0E+04 | 7.1E+04 | 6.6E+04 | 8.6E+02 | 1.2E+03   | 1.0E+04 | 1.2E+04   |
| 7 Prunus_v4_Contig9018     | indole-3-acetic acid inducible 19               | 0.82  | 1.1E+04               | 3.1E+04 | 4.8E+04 | 4.7E+04 | 1.5E+01 | 7.2E+02   | 5.4E+03 | 6.6E+03   |
| 8 Prunus_v4_Contig9000     | SAUR-like auxin-responsive protein family       | -0.36 | 4.0E+03               | 8.2E+03 | 4.7E+03 | 1.1E+03 | 4.9E+01 | 1.8E+01   | 1.5E+01 | 2.9E+00   |
| 9 Prunus_v4_Contig565      | SAUR-like auxin-responsive protein family       | 0.48  | 3.4E+03               | 6.3E+03 | 9.7E+03 | 5.0E+03 | 3.6E+01 | 1.6E+01   | 9.4E+01 | 4.6E+01   |
| 10 Prunus_v4_Contig5592    | ATAUX2-11 (indoleacetic acid-induced protein 4) | 0.78  | 5.9E+03               | 1.8E+04 | 4.9E+04 | 3.6E+04 | 1.8E+02 | 6.1E+02   | 9.9E+02 | 3.8E+02   |
| 11 Prunus_v4_Contig1545    | IAA16 (indoleacetic acid-induced protein 16)    | 0.87  | 5.2E+04               | 1.8E+05 | 2.5E+05 | 2.1E+05 | 3.2E+03 | 7.0E+03   | 6.1E+04 | 6.4E+03   |
| 12 Prunus_BU044903         | IAA16 (indoleacetic acid-induced protein 16)    | 0.92  | 7.3E+03               | 4.0E+04 | 7.5E+04 | 6.5E+04 | 1.1E+03 | 9.3E+02   | 9.3E+03 | 1.0E+03   |
| 13 Prunus_BU039946         | SAUR-like auxin-responsive protein family       | 0.88  | 1.2E+02               | 1.9E+03 | 5.6E+03 | 2.9E+03 | 3.0E+01 | 3.7E+00   | 7.8E+00 | 2.2E+01   |

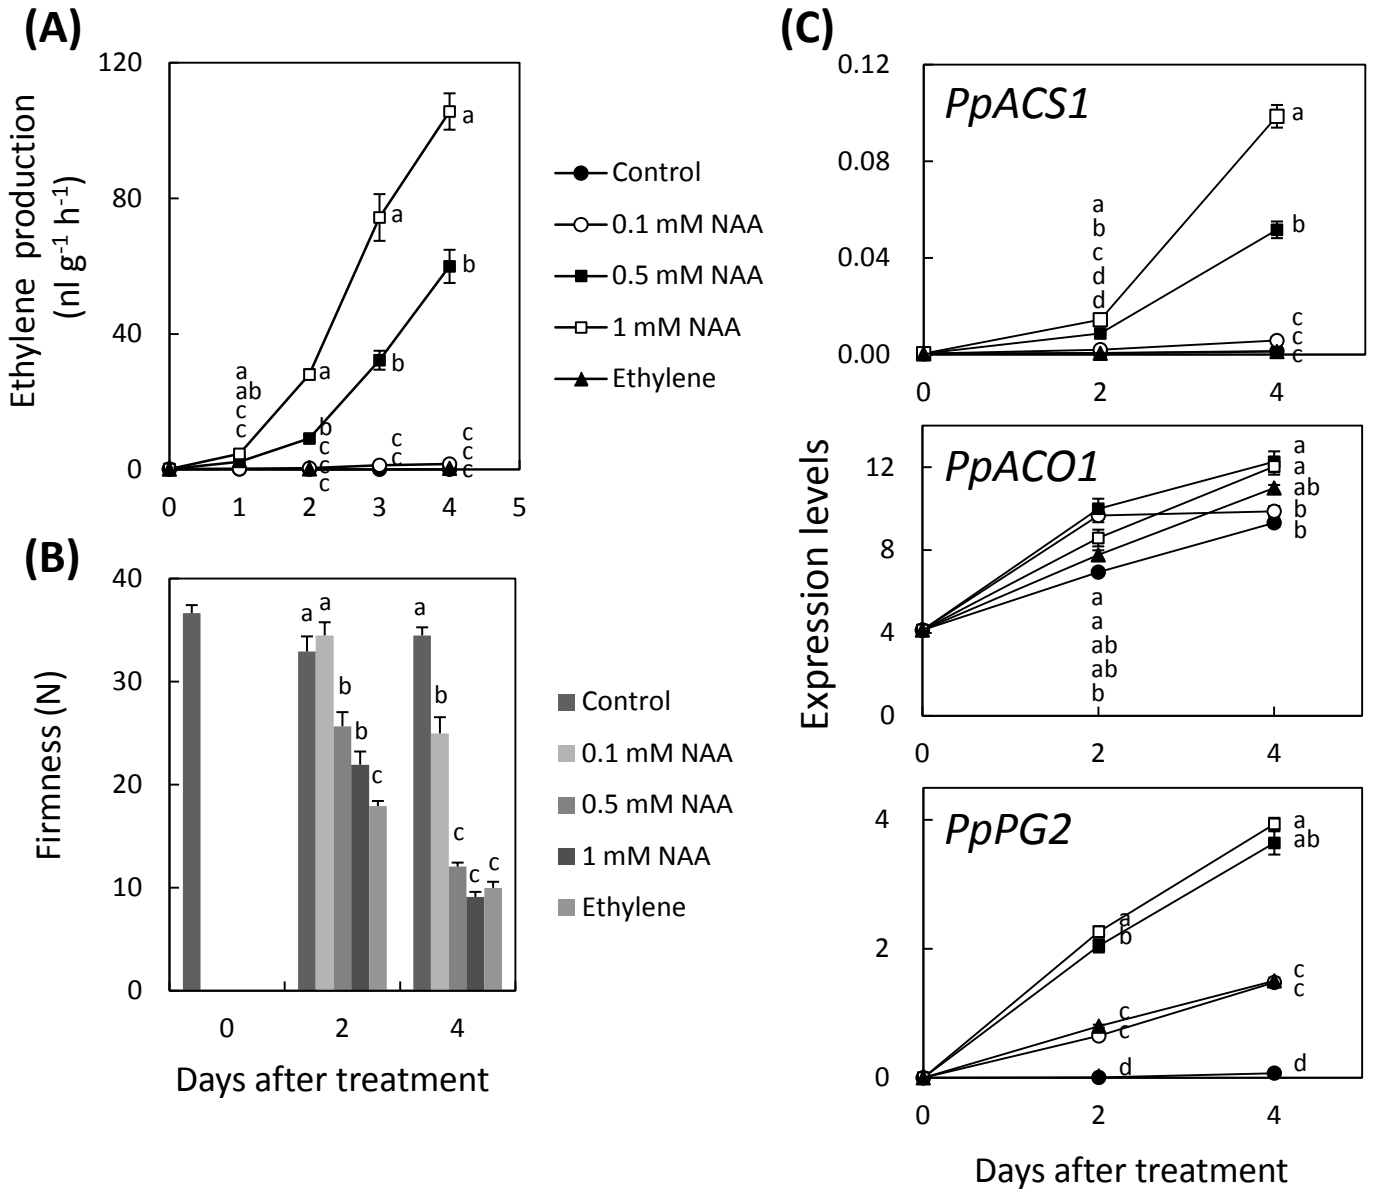

Figure S1

**(A)**

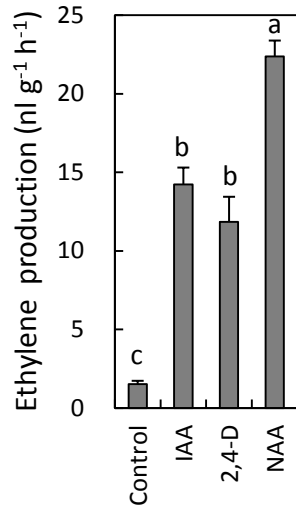

**(B)**

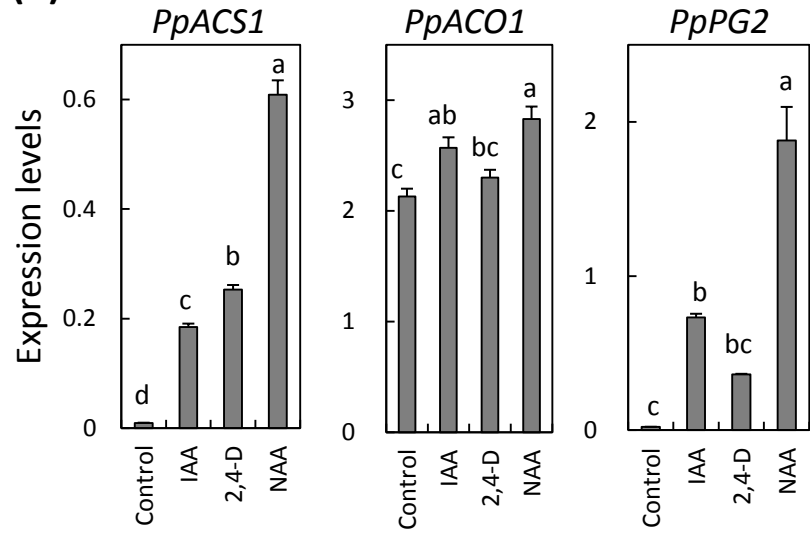

Figure S2

### Figure Legends (Supplementary data)

Fig. S1 Effects of NAA on 'Odoroki' fruit ripening and gene expression. (A) Ethylene production, (B) flesh firmness of NAA-treated 'Akatsuki' fruit. Harvested mature fruit of 'Manami' were treated with 0.1 mM, 0.5 mM and 1 mM NAA each day or continuous  $20 \mu\text{l L}^{-1}$  ethylene. Vertical bars represent the SE ( $n = 10$ ). (C) Relative transcript abundance of *PpACS1*, *PpACO1*, and *PpPG2*. The steady-state levels were normalized to *actin*. Data are mean values  $\pm$  SD of three individual experiments, each performed in triplicate. Different letters indicated significant differences within the same day at  $p < 0.05$  using Tukey's *post hoc* test.

Fig. S2 Effect of some auxins on ethylene production and expression patterns of ripening-related genes of 'Manami'. (A) Ethylene production, and (B) relative transcript abundance of *PpACS1*, *PpACO1*, and *PpPG2* in mesocarp disks of 'Manami' treated with 0.5 mM IAA, 0.5 mM 2,4-D, or 0.5 mM NAA. Tissue cylinders (9 mm in diameter) were excised from 'Manami' mesocarp with a cork borer, 5 mm thick discs were cut with a razor blade from the cylinders, and 42 discs were used for each treatment. The prepared discs were placed on paper filters soaked with auxin or anti-auxin solution and stored at 28 °C for 18 h. Vertical bars of ethylene production represent the SE ( $n = 10$ ). (B) The steady-state levels were normalized to *actin*. Data are mean values  $\pm$  SD of three individual experiments, each performed in triplicate. Different letters indicated significant differences at  $p < 0.05$  using Tukey's *post hoc* test.
